# Supplementary material for: The frequency of follicular T helper cells differs in acute and chronic neuroinflammation
Source: PubMed Central journal article supplement (PMC7686332; doi:10.1038/s41598-020-77588-9), 2020-11-24
Supplement: 41598_2020_77588_MOESM1_ESM.pdf [file 41598_2020_77588_MOESM1_ESM.pdf]

## The frequency of follicular T helper cells differs in acute and chronic neuroinflammation

Adalie Baniahmad, Katharina Birkner, Johanna Görg, Julia Loos, Frauke Zipp, Beatrice Wasser, and Stefan Bittner

### Supplemental Material

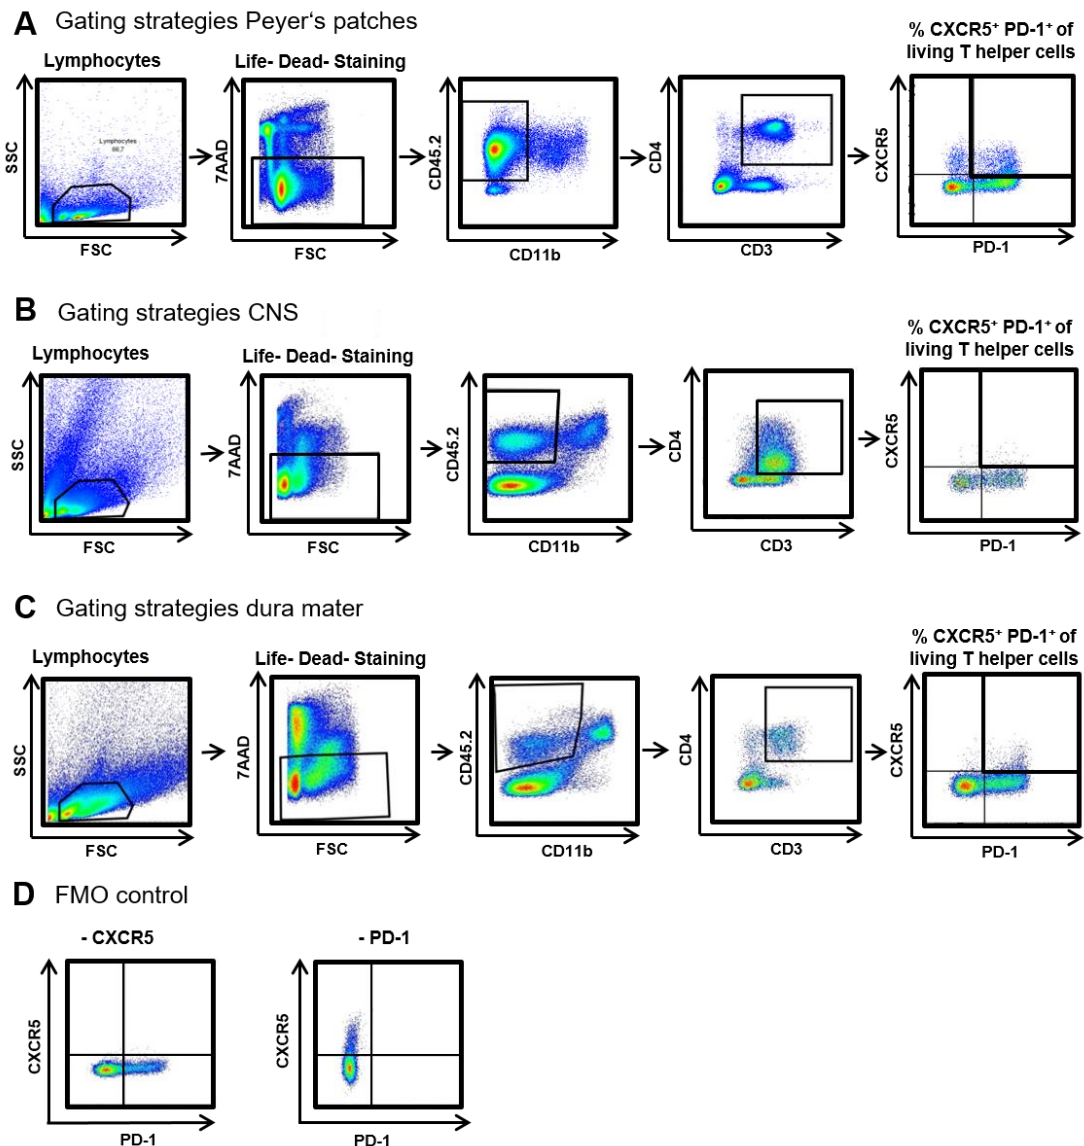

**Supplemental Figure 1: Gating strategies of Tfh cells in flow cytometry analysis.** Single cell suspensions of Peyer's patches (**A**), CNS (**B**) and dura mater (**C**) of EAE-diseased SJL/J and C57BL/6 mice were prepared and analyzed by FACS. Live-dead-staining of the lymphocytes was performed with 7-aminoactinomycin (7AAD). The inclusion of leucocytes and exclusion of monocytes followed, gating on the CD45<sup>+</sup> and CD11b<sup>-</sup> population. T helper cells were then defined as CD4<sup>+</sup> CD3<sup>+</sup> leucocytes. Finally, our target population of Tfh cells was characterized as the percentage of CXCR5<sup>+</sup> PD-1<sup>+</sup> cells of living T-helper cells. Additionally, Fluorescence Minus One (FMO) control for the relevant marker CXCR5 and PD-1 was performed (**D**).



### A C57B6/J total cell count

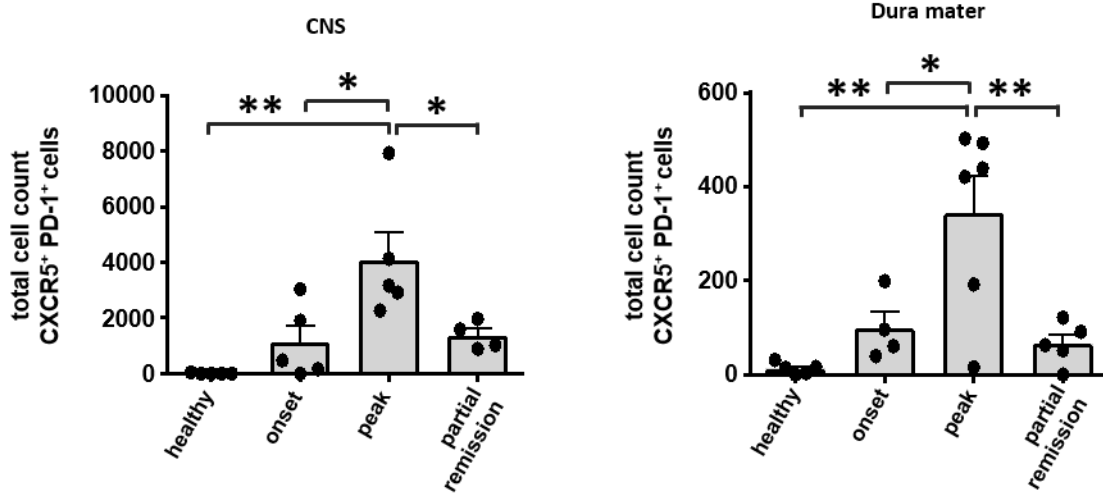

### B SJL/J total cell count

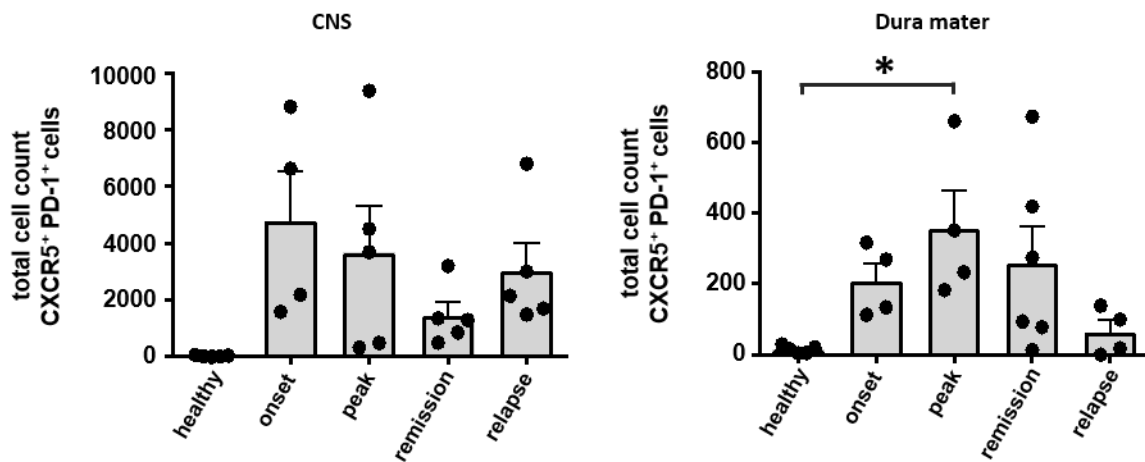

**Supplemental Figure 3: Absolute Tfh cell count in health and disease.** EAE was induced in C57BL/6 mice via MOG<sub>35-55</sub> peptide immunization (**A**) or in SJL/J mice via PLP<sub>139-151</sub> peptide immunization (**B**). In addition, non-immunized (healthy) mice were analyzed. Absolute numbers of living Tfh cells (CD45+CD11b-CD4+CXCR5+PD-1+) were compared between the defined disease stages (n=4-5) in the CNS (left panel) and dura mater (right panel). Statistical analysis was performed using one-way ANOVA followed by Tukey's multiple comparison test. \* p<0.05; \*\* p< 0.01.

**Supplemental Table 1: Characteristics of Th17 cell adoptive transfer EAE.**

| <b>Characteristics of adoptive EAE: Th17-skewed cells transferred into Rag2<sup>-/-</sup> mice</b> |                   |
|----------------------------------------------------------------------------------------------------|-------------------|
| <b>sex of mice (f/m)</b>                                                                           | 20/3              |
| <b>total mice included</b>                                                                         | 23                |
| <b>day of onset (mean + range)</b>                                                                 | 19.5 [18-22] days |
| <b>day of peak (mean + range)</b>                                                                  | 26 [24-30] days   |
| <b>time between onset and peak (mean + range)</b>                                                  | 6.5 [3-12] days   |
| <b>maximum score (mean + range)</b>                                                                | 3.25 [3-4]        |
